# Supplementary material for: Self-Healing and Mechanical Properties of Thermoplastic Polyurethane/Eugenol-Based Phenoxy Resin Blends via Exchange Reactions
Source: MDPI journal article supplement (doi:10.3390/polym12051011), 2020-04-28
Supplement: s1 [file s1]

## Supporting information

# Self-healing and mechanical properties of thermoplastic polyurethane/eugenol-based phenoxy resin blends via exchange reactions

Jing-Yu Liang <sup>1†</sup>, Se-Ra Shin<sup>2†</sup>, Soo-Hyoung Lee<sup>1\*</sup>, and Dai-Soo Lee <sup>3,\*</sup>

<sup>1</sup> Department of Semiconductor and Chemical Engineering, Chonbuk National University, 567 Baekje-daero, Deokjin-gu, Jeonju 54896, Korea; [liangjy@naver.com](mailto:liangjy@naver.com) (J.-Y.L.)

<sup>2</sup> Research Institute of Jungwoo Fine Chemical, 68-3 Seogam-ro 1-gil, Iksan, 54586, Korea: [srshin89@jbnu.ac.kr](mailto:srshin89@jbnu.ac.kr) (S.-R.S.)

<sup>3</sup> Research Institute of Future Energy, Chonbuk National University, 567 Baekje-daero, Deokjini-gu, Jeonju 54896, Korea

\* Correspondence: [shlee66@jbnu.ac.kr](mailto:shlee66@jbnu.ac.kr) (S.-H.L.); [daisoolee@jbnu.ac.kr](mailto:daisoolee@jbnu.ac.kr)(D.-S.L); Tel.: +82-63-270-2435(S.H.L); +82-10-6660-7693(D.S.L)

† Contributed equally to this work.

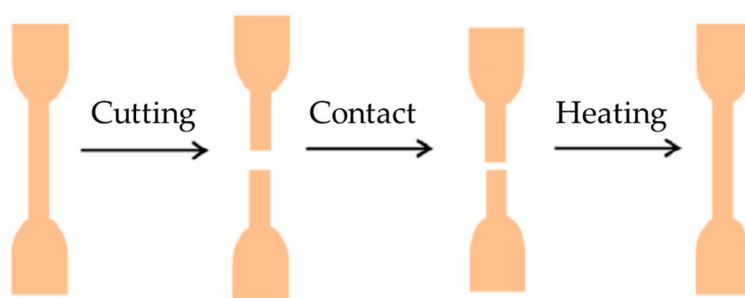

**Scheme S1.** Schematics of self-healing process.

**Table S1.** Average weights of TPUs and phenoxy resin determined by GPC\*.

| Sample         | Average Molecular Weight |                |                |                                |
|----------------|--------------------------|----------------|----------------|--------------------------------|
|                | M <sub>n</sub>           | M <sub>w</sub> | M <sub>z</sub> | M <sub>w</sub> /M <sub>n</sub> |
| Ester-type TPU | 45,000                   | 83,000         | 130000         | 1.83                           |
| Ether-type TPU | 56,000                   | 120,000        | 240000         | 2.17                           |
| Phenoxy resin  | 2,400                    | 4,000          | 7400           | 1.74                           |

\* Average molecular weights of TPU and phenoxy resin were determined by GPC (Agilent 1200S; Agilent) employing a refractive index detector (Optilab rEX; Wyatt). Samples were dissolved in DMF/THF (1:1 wt./wt.), and polystyrene standards were used for universal calibration.

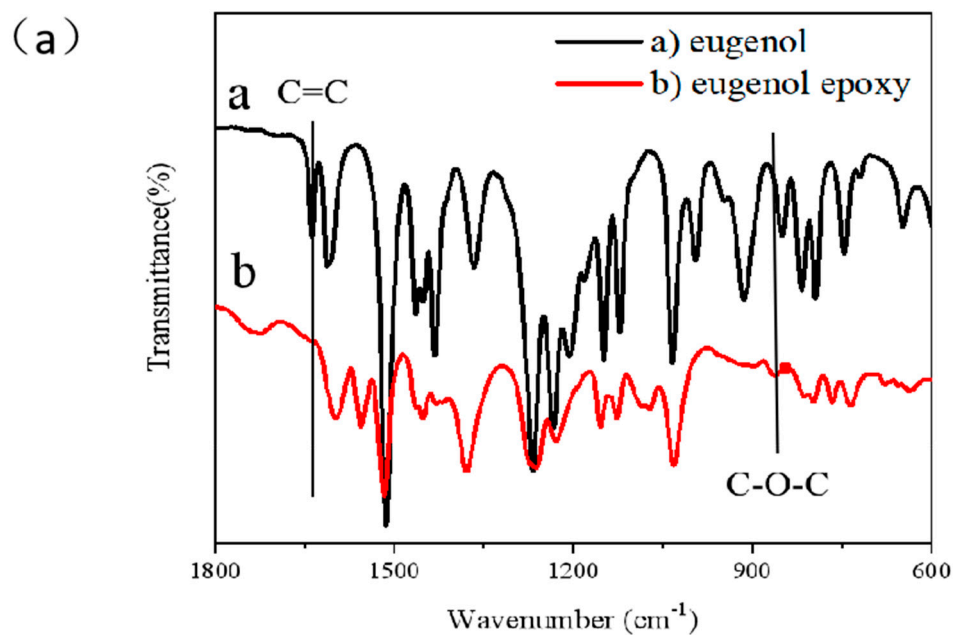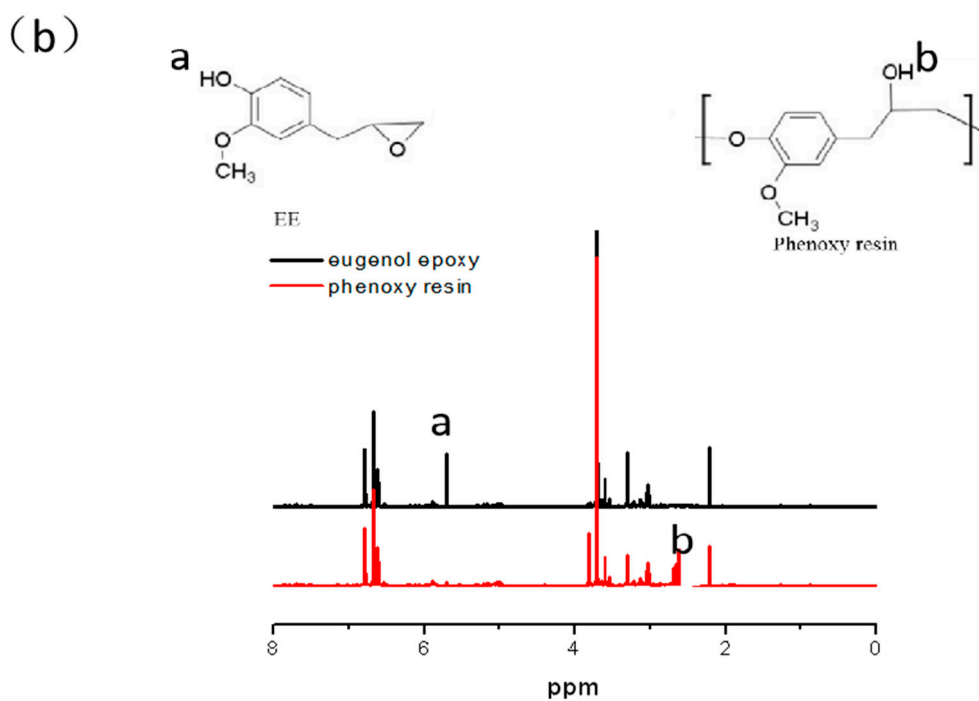

Figure S1. FTIR spectra (a) and  $^1\text{H}$  NMR spectra (b) of EE and phenoxy.

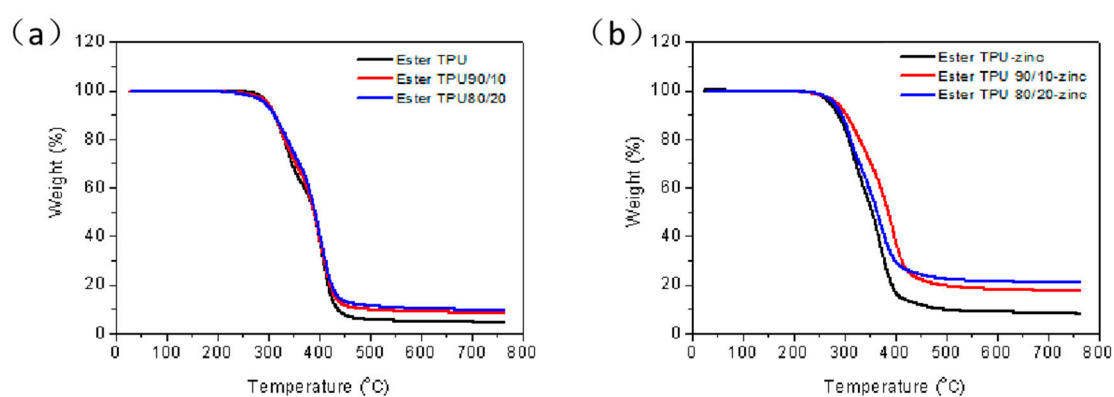

**Figure S2.** TGA thermograms of ester-type TPU/phenoxy blends without catalyst (a), ester-type TPU/phenoxy blends in the presence of catalyst, zinc acetate.

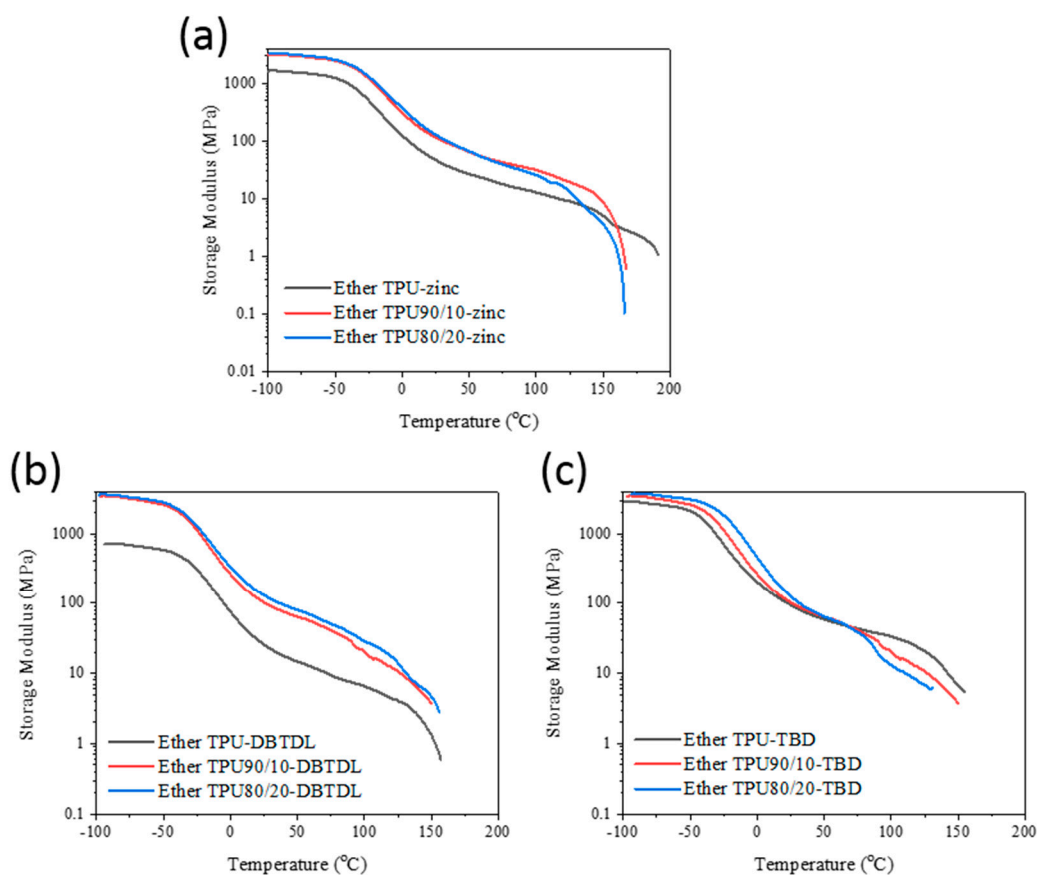

**Figure S3.** DMA curves of ether TPU/phenoxy blends, (a) Storage modulus for the ether-type TPU blends with zinc acetate as catalyst, (b) Storage modulus for the ester-type TPU blends with DBTDL as catalyst, (c) Storage modulus for the ether-type TPU blends with TBD as catalyst.

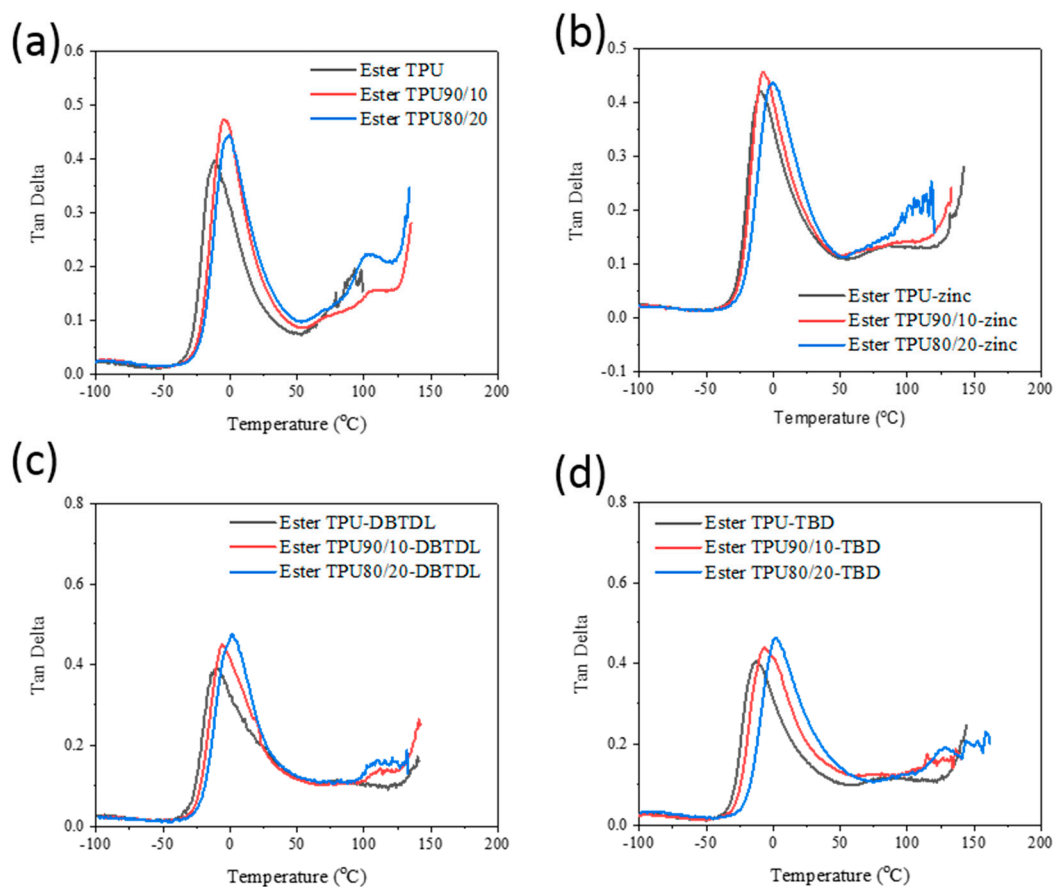

**Figure S4.** Tan Delta curves of ester TPU/phenoxy blends, (a) Ester-type TPU blends without catalyst, (b) Ester-type TPU blends with zinc acetate as catalyst, (c) Ester-type TPU blends with DBTDL as catalyst, (d) Ester TPU blends with TBD as catalyst.

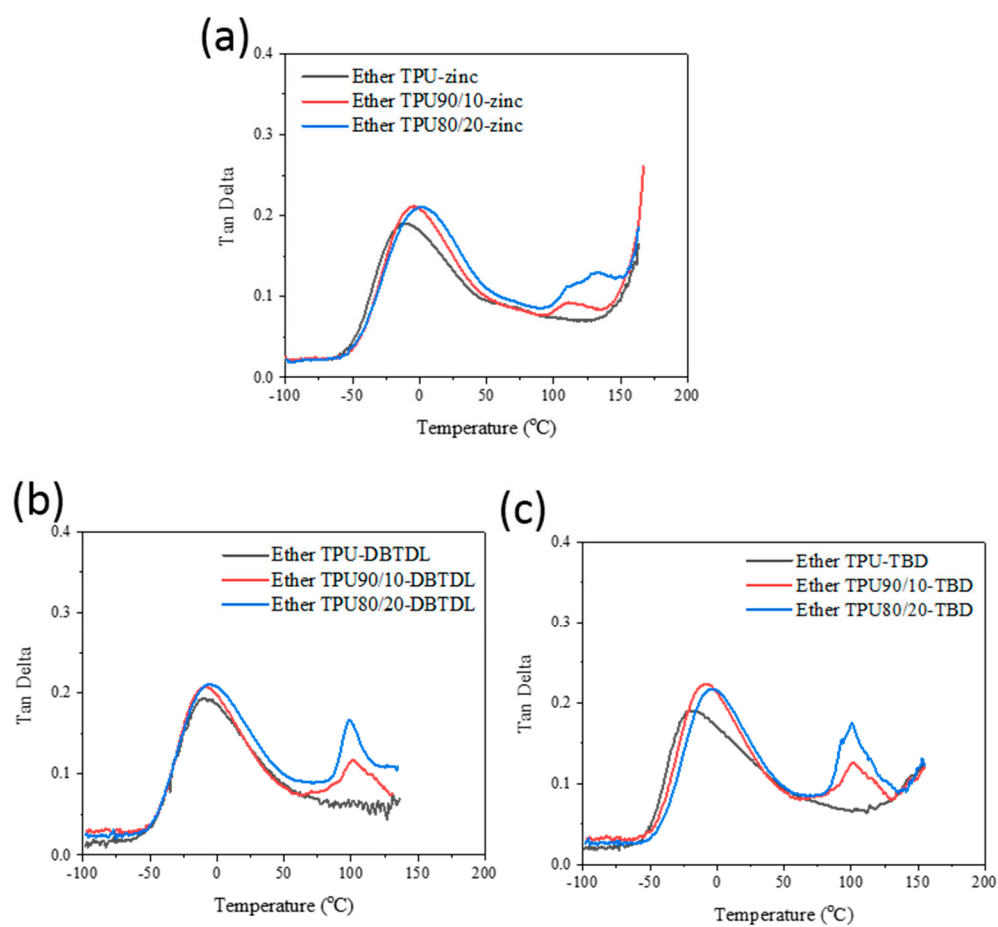

**Figure S5.** Tan Delta curves of ether-type TPU/phenoxy blends, (a) Ether-type TPU blends with zinc acetate as catalyst, (b) Ether-type TPU blends with DBTDL as catalyst, (c) Ether-type TPU blends with TBD as catalyst.
